# Supplementary material for: Review and Comparison of Antimicrobial Resistance Gene Databases
Source: MDPI journal article supplement (doi:10.3390/antibiotics11030339), 2022-03-04
Supplement: s1 [file s1]

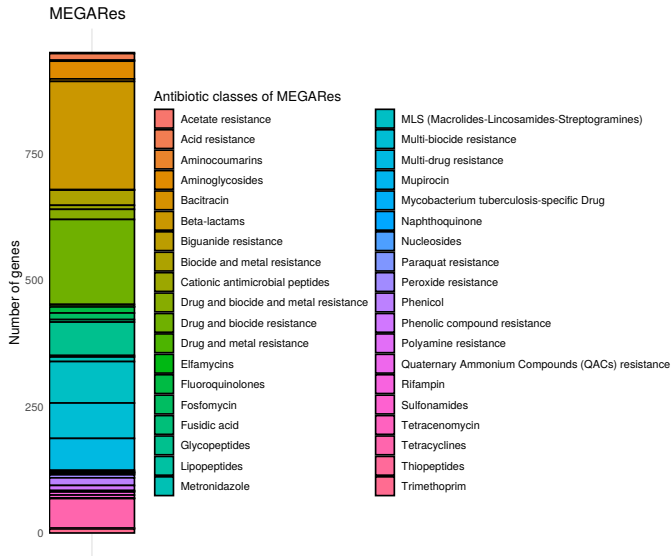

**Supplementary Figure S1: MEGARes gene counts of each antibiotic class.** Number of resistance genes were determined for each class of antibiotics stored in the MEGARes database. Only antibiotic- and biocid resistance genes were considered for this plot.

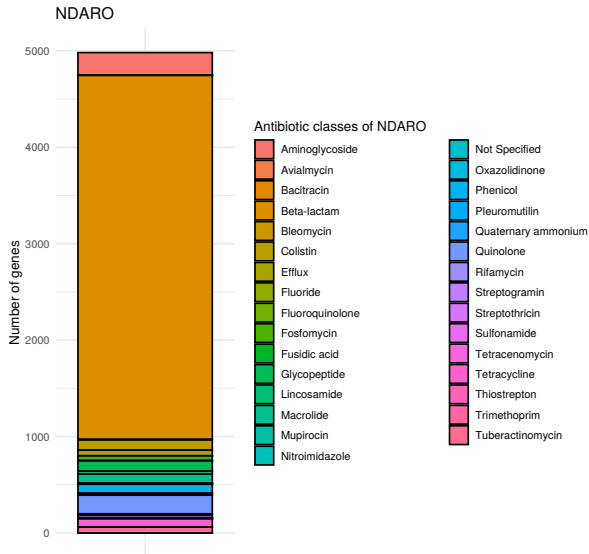

**Supplementary Figure S2: NDAO gene counts of each antibiotic class.** Number of resistance genes were determined for each class of antibiotics stored in the NDAO database. Only antibiotic- and biocid resistance genes were considered for this plot.

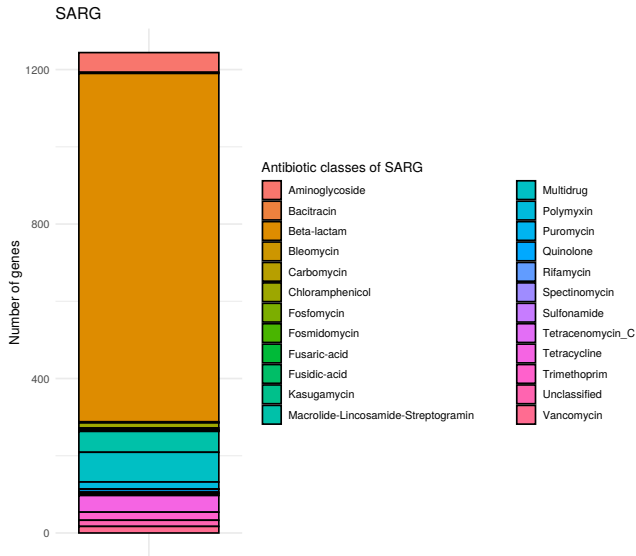

**Supplementary Figure S3: SARG gene counts of each antibiotic class.** Number of resistance genes were determined for each class of antibiotics stored in the SARG database. Only antibiotic- and biocid resistance genes were considered for this plot.
